# Supplementary material
Source: Elsevier journal article supplement (https://www.sciencedirect.com/science/article/pii/S0213911119301724)
Supplement: mmc1 [file S0213911119301724:mmc1.docx]

| Fecha y lugar de la entrevista:  Hora de inicio:  Hora de finalización:  Moderadores:  De cada participante: nombre, edad, sexo, formación, cargo, institución, red y tiempo en el cargo |
| --- |
| 1. ¿Qué formas/mecanismos utilizan para coordinar la atención al paciente con los otros niveles asistenciales? ¿Qué les parecen? ¿Cómo creen que contribuyen estos mecanismos a la coordinación asistencial? ¿Y a la formación? ¿Y a la calidad de la atención?  - Mecanismos de coordinación de la gestión clínica: guías de práctica clínica, protocolos, guía farmacológica compartida, grupos de trabajo entre niveles, educación continuada, profesional coordinador de programas, auditoria clínica. - Mecanismos de coordinación de la información: hoja de referencia y contrarreferencia, informe de alta hospitalaria, historia clínica. |
| 1. ¿Qué opinan del uso por parte de los profesionales de los diferentes niveles de atención de la red? ¿Qué facilita su uso? ¿Qué lo dificulta? ¿Por qué? ¿Qué mejorarían? |
| 1. ¿Cómo han sido diseñados (¿quién ha participado?, ¿cómo?) y cómo se han divulgado a los profesionales? ¿Se han evaluado? ¿Qué les parece? ¿Qué mejorarían? |

**Apéndice**

**Guía de entrevista individual y grupos de discusión sobre mecanismos de coordinación clínica entre niveles de atención**
